# Supplementary material for: Carbon supported olivine type phosphate framework: a promising electrocatalyst for sensitive detection of dopamine
Source: Royal Society of Chemistry journal article supplement (doi:10.1039/c8ra05034a), 2018-01-01
Supplement: c8ra05034a1.pdf [file c8ra05034a1.pdf]

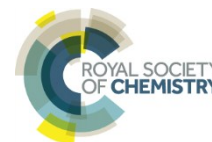

## Supporting Information

# Carbon supported Olivine type phosphate framework: a promising electrocatalyst for sensitive detection of dopamine

Raja Nehru<sup>‡</sup>, Raman Sankar<sup>†,‡</sup>, \* and Shen-Ming Chen<sup>‡</sup>

Received 00th January 20xx,  
Accepted 00th January 20xx

DOI: 10.1039/x0xx00000x

www.rsc.org/

## 1. Synthesis and crystal growth

The LiMnPO<sub>4</sub> single crystals were prepared by the traveling solvent floating zone (FZ) method and the flux growth technique. For FZ method, initially, the LiMnPO<sub>4</sub> polycrystalline sample was prepared by standard solid reaction method. The stoichiometric amounts of Li<sub>3</sub>PO<sub>4</sub> (Chempur 99.99 %), MnCO<sub>3</sub> (Aldrich 99.99 %) and NH<sub>4</sub>H<sub>2</sub>PO<sub>4</sub> (Chempur 99.99 %) were ground together carefully to homogeneity in an agate mortar and sintered in alumina crucible several times for 48 hours at 800 °C in Ar atmosphere with intermediate grinding until a single phase LiMnPO<sub>4</sub> sample was obtained. The final single phase of LiMnPO<sub>4</sub> sample is in an orange-white color. The obtained pure powder sample was pressed into rods shape polycrystalline sample using hydrostatic pressure and then again sintered for 34 h at 800 °C. The four 300 W air-cooled halogen lamps were employed. A quartz tube with 4 mm wall thickness was used as the growth chamber. The applied Ar pressure in the growth chamber was 3 bar. The feed rod was rotated clockwise at a rate of 12 rpm, and the seed anticlockwise 12 rpm. The growth rate was 1.5 mm/h. On the other hand, LiCl was used as the flux for flux growth of the LiMnPO<sub>4</sub> single crystal. The stoichiometric mixer of high purity MnCl<sub>2</sub> (99.999% Aldrich) and Li<sub>3</sub>PO<sub>4</sub> (99.999% Aldrich), and the flux LiCl were placed in an alumina crucible (Mixture and flux LiCl ratio was AA: BB). Then the crucible was placed into the furnace and heated to 800 °C. Further, the temperature 800 °C was maintained for 24 hours to get homogeneous melt. The furnace was allowed to cool slowly to 600 °C at a rate of 1 °C/h and then cooled to room temperature at a rate of 70 °C/h. Finally, pink in color of the LiMnPO<sub>4</sub> single crystal was obtained. Finally, pink in color of the LiMnPO<sub>4</sub> single crystal was obtained.

## 2. X-ray photoelectron spectroscopy (XPS)

The X-ray photoelectron spectroscopy (XPS) was employed to study the chemical state of LiMnPO<sub>4</sub>/f-MWCNTs composite. The XPS spectrum is shown in Fig.3 (a) indicates the existence of principal elements peaks, such as Li, Mn, and P along with traces of the oxygen element. The P 2p spectrum of the working electrode used to displays two components due to spin-orbit coupling (2p<sub>3/2</sub> and 2p<sub>1/2</sub> separated by ~0.9 eV), it is observed that there is a single peak at 133.9 eV. The observation of only one P 2p peak is associated to the phosphate (PO<sub>4</sub>)<sup>3-</sup> ion of LiMnPO<sub>4</sub>/f-MWCNTs. The core level spectrum of Mn 2p shown in Fig.3 (f). The Mn 2p spectrum consisted of two major peaks corresponding to Mn 2p<sub>3/2</sub> and Mn 2p<sub>1/2</sub>, respectively. The peak positions at the binding energy of 644 eV (2p<sub>3/2</sub>) and 655 eV (2p<sub>1/2</sub>) are related to the +2 oxidation state of Mn. Fig.3 (d) shows that the C 1s core level spectrum with the binding energy 287.3 eV belongs to C=O groups from carbon. The O 1s spectrum of the starting electrode displays a narrow peak at 531.4 eV, which is attributed to oxygen atoms of the (PO<sub>4</sub>)<sup>3-</sup> phosphate ion of LiMnPO<sub>4</sub>/f-MWCNTs composite. The observed results are in agreement with the earlier report .2, 3

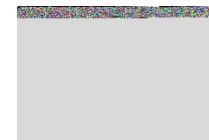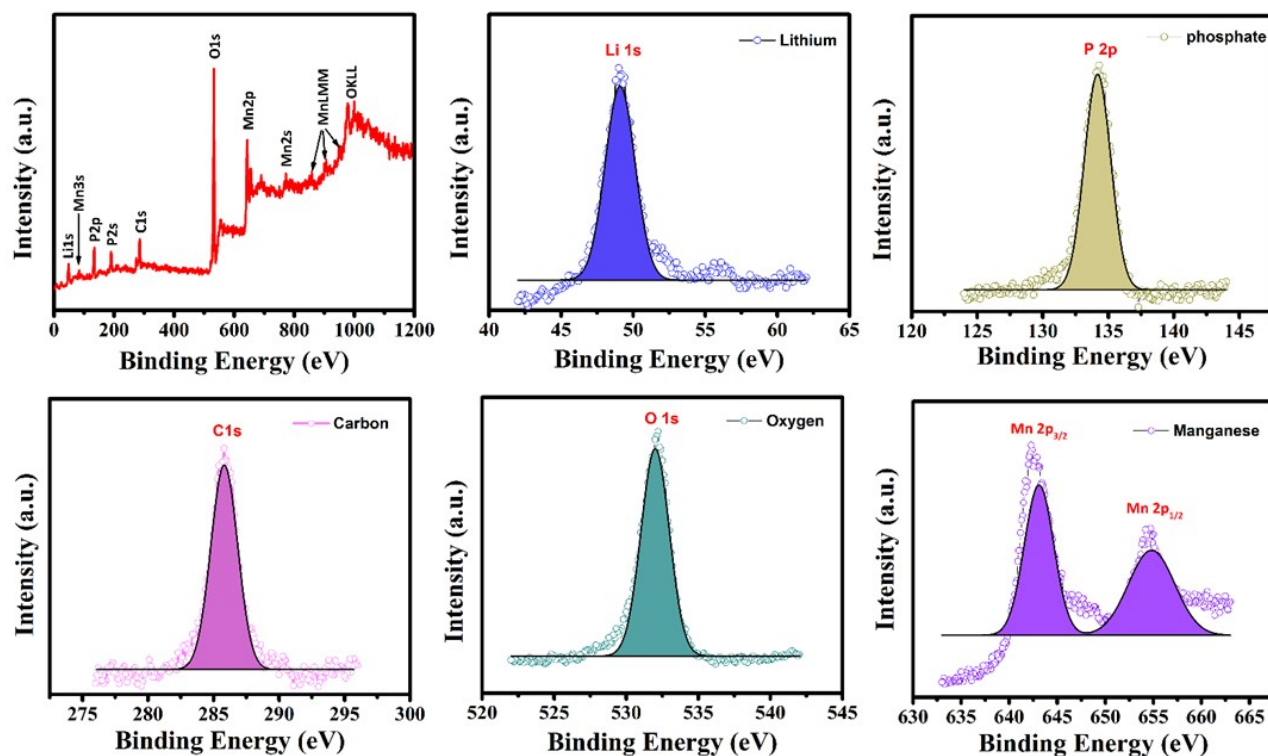

**Fig.S1.** (a) XPS survey-scan spectrum of *LiMnPO<sub>4</sub>/f-MWCNTs* composite, (b) high resolution spectrum of Li1s (c) P2p, (d) C1s, (e) O1s and (f) Mn2p.

### 3. Magnetism of *LiMnPO<sub>4</sub>*

The  $\chi(T)$  increases with a decrease in temperature and attained a broad maximum at 37 K which is a characteristic feature of low-dimensionality.  $\chi(T)$  decreases with a further decrease in temperature. The first derivative of susceptibility ( $d\chi(T)/dT$ ) exhibits a sharp peak at 33 K which correspond to a long-range AFM transition. At high temperature ( $T > 100$ ), the  $\chi(T)$  data can be fitted with the Curie-Weiss law [ $\chi(T) = C/(T - \theta)$ ] satisfactorily. The fit yields  $\mu_{\text{eff}} = 6 \mu_{\text{B}}$  which is well agreed with the spin-only value of  $\text{Mn}^{2+}$  ( $5.9 \mu_{\text{B}}$ ) and Weiss temperature  $\theta = -63$  K. The negative Weiss temperature indicates an antiferromagnetic coupling between Mn ions. The strongest exchange interaction occurs by Mn-O-Mn bond in the b-c plane. The super-super exchange interaction occurs through Mn-O-P-O-Mn in the interlayer magnetic coupling.

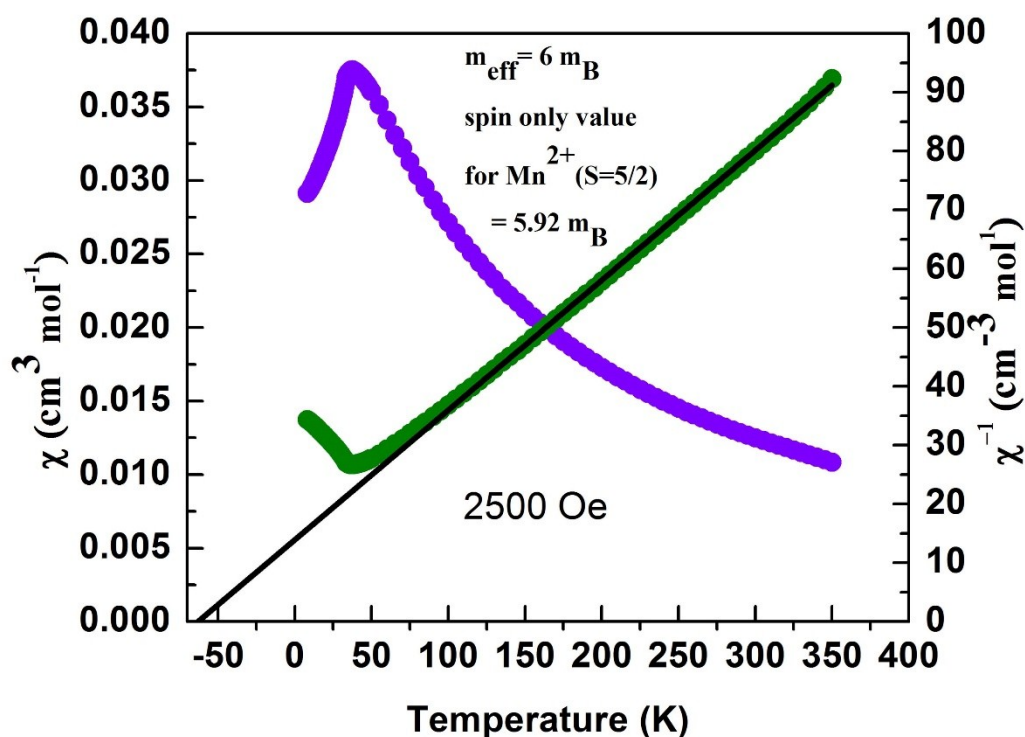

Fig.S2 (a) shows the temperature dependence of magnetic susceptibility  $\chi(T)$  and the corresponding inverse susceptibility measured at an applied magnetic field of 2500 Oe in the temperature range between 8 and 350 K.

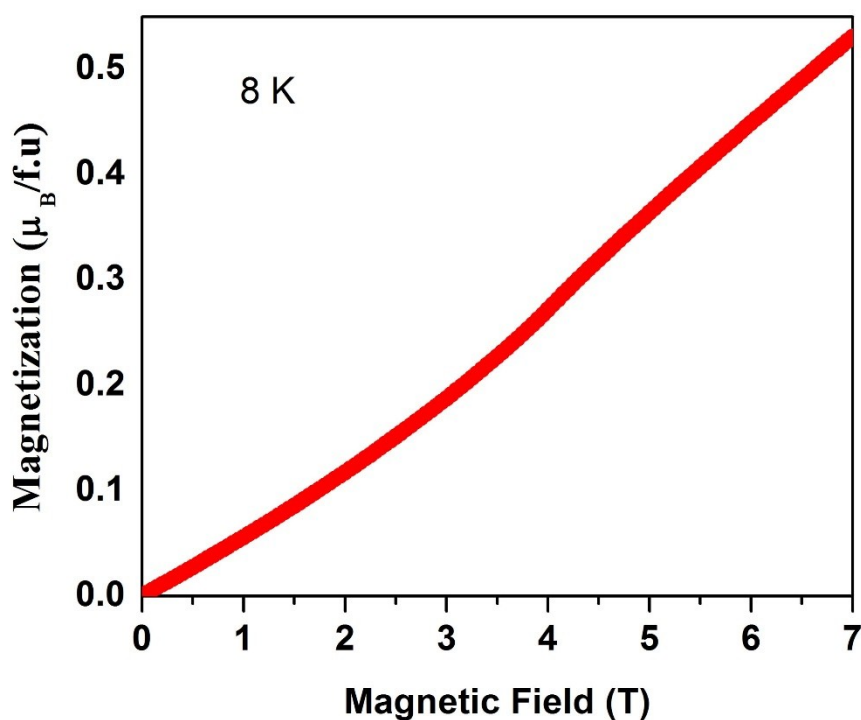

Fig.S3 (b) depicts the magnetization versus magnetic field up to 7 T at 8 K. The magnetization curve varies nonlinearly with applied magnetic field, suggesting spin-flop transition occurs at 4 T.

#### 4.Optimization

The optimization studies are more important and it may directly affect the electrochemical behavior of DA. Hence, the optimization drop coating amount of LiMnPO<sub>4</sub>/f-MWCNTs composite towards the detection of 50  $\mu\text{M}$  DA was investigated by CV. The optimization result is shown in Fig. S7. The 6  $\mu\text{L}$  drop coated LiMnPO<sub>4</sub>/f-MWCNTs composite modified electrode showed a maximum current response for DA than that of other drop coated electrodes. Hence, 6  $\mu\text{L}$  drop coated LiMnPO<sub>4</sub>/f-MWCNTs composite modified electrode was used as an optimum quantity for further electrochemical investigations.

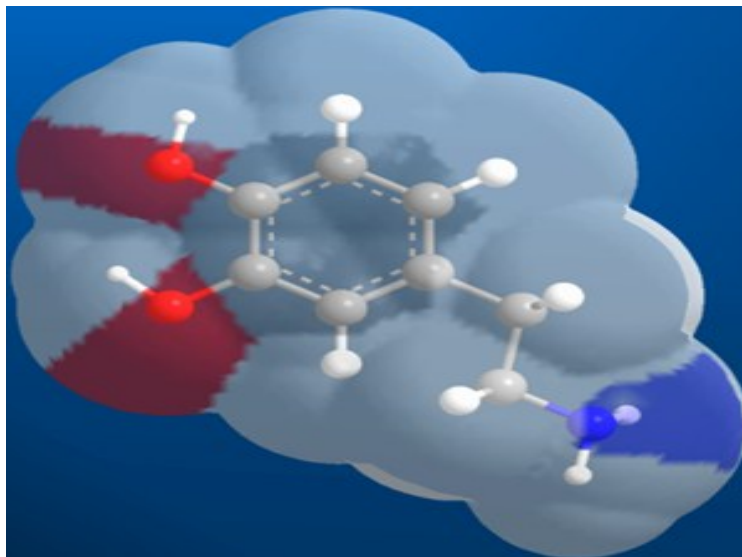

Fig S4 The 3D structural view of the DA. (IUPAC Name: 4-(2-aminoethyl) benzene-1,2-diol)

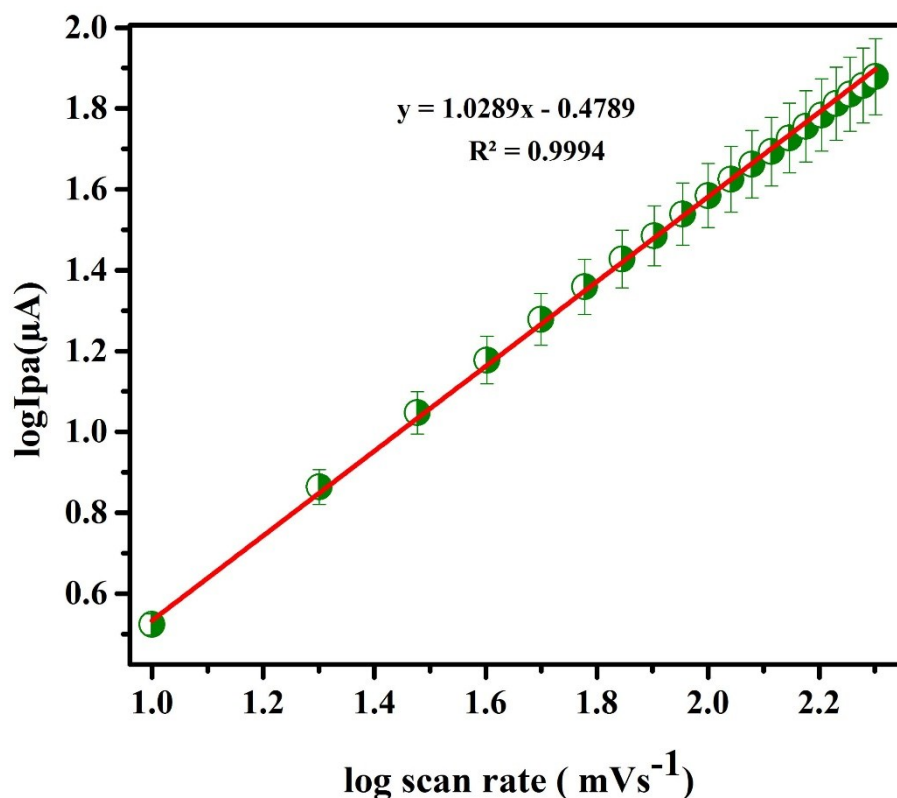

Fig S5. The logarithmic plot of scan rate versus log (Ipa)

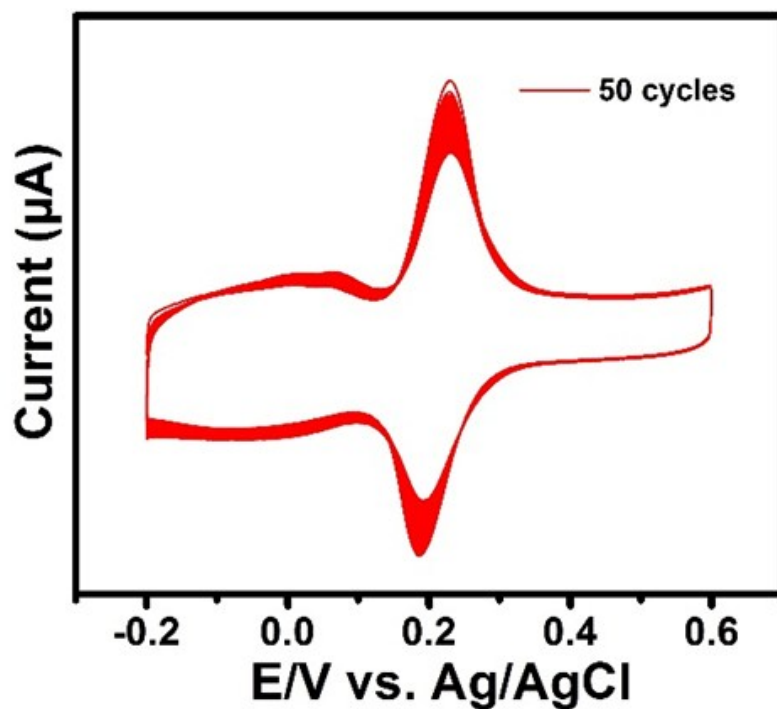

Fig.S6 The sensing performance of LiMnPO<sub>4</sub>/f-MWCNTs composites recorded continuously up to 50 cycles.

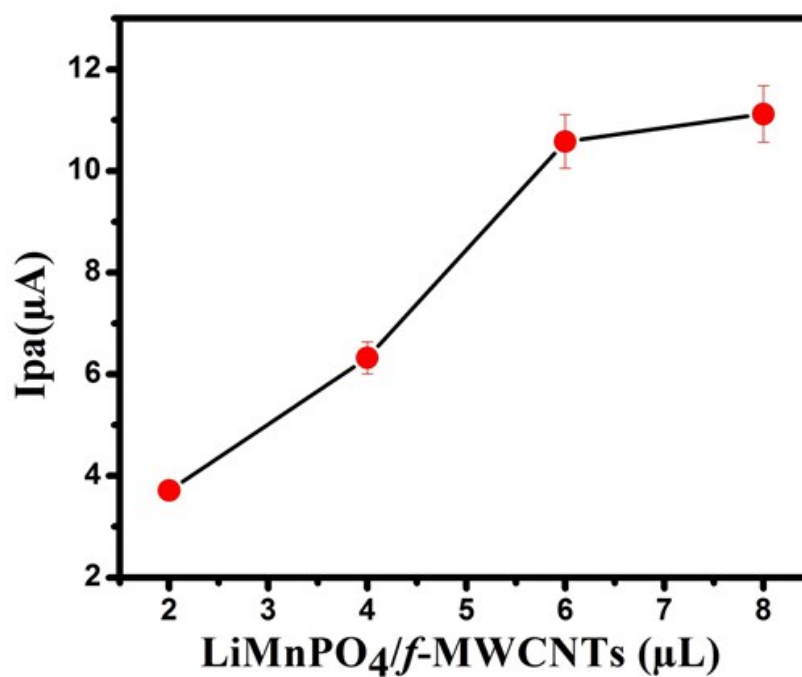

Fig.S7. The CV response for different drop coated LiMnPO<sub>4</sub>/f-MWCNTs composite in 50  $\mu\text{M}$  DA at a scan rate of 50 mV s<sup>-1</sup>.

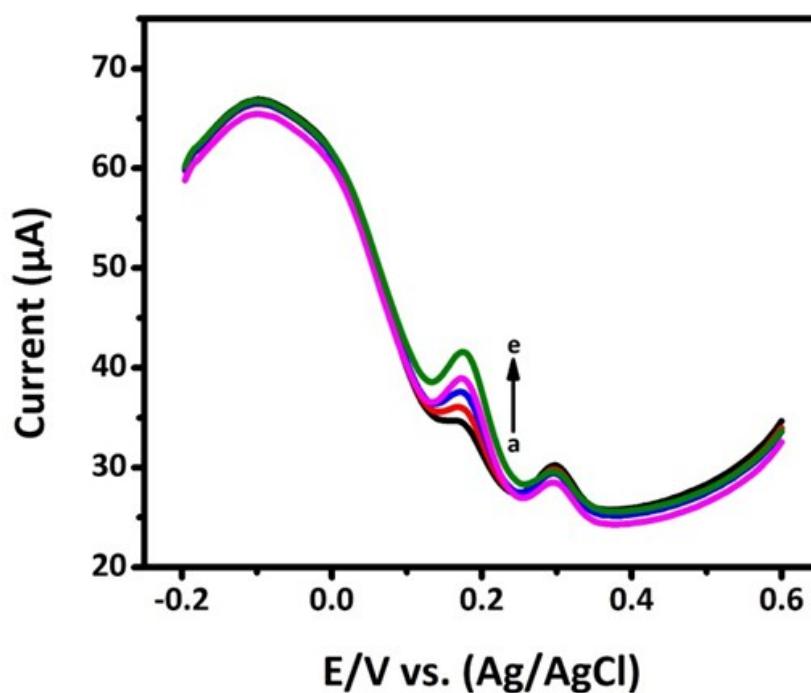

**Fig S8.** DPV response of GCE/LiMnPO<sub>4</sub>/f-MWCNTs modified electrode in the presence of 0.05 M PB solution containing real samples at different concentration (0.001 M) of DA for Human serum sample at different concentration of DA (a) 10, (b) 20, (c) 30, (d) 40, (e) 50.

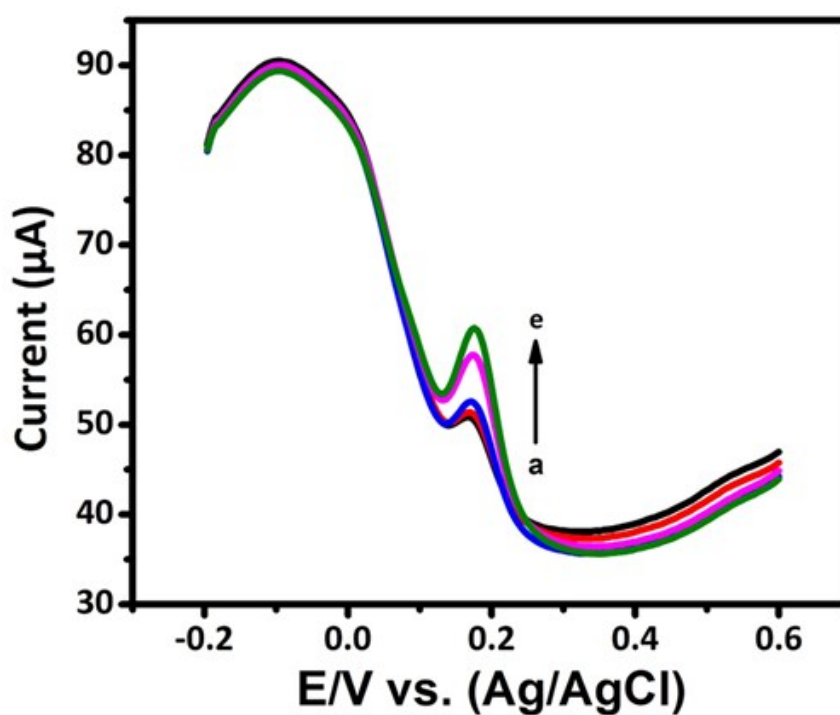

**Fig 9.** DPV response of GCE/LiMnPO<sub>4</sub>/f-MWCNTs modified electrode in the presence of 0.05 M PB solution containing real samples at different concentration (0.001 M) of DA for rat brain sample at different concentration of DA (a) 10, (b) 20, (c) 30, (d) 40, (e) 50.

## Tabulation

**Table 1.** The binding energy of detected elements and assignation of materials determined by XPS

| Photoelectron      | C-LiMnPO <sub>4</sub> |                    | Assignation                                                      |
|--------------------|-----------------------|--------------------|------------------------------------------------------------------|
|                    | Binding energy/ eV    | State ratio/ at. % |                                                                  |
| C 1s               | 287.3                 | 13.8               | C=O                                                              |
| O 1s               | 531.4                 | 46.8               | C=O, Metal-O, PO <sub>x</sub>                                    |
| Li 1s              | 55.3                  | 19.0               | Li <sub>x</sub> O <sub>y</sub> , Li <sub>x</sub> PO <sub>y</sub> |
| P 2p               | 133.9                 | 12.4               | PO <sub>x</sub>                                                  |
| Mn 2p <sub>3</sub> | 642.9                 | 8.0                | Mn <sub>x</sub> O <sub>y</sub>                                   |

## References

1. R. Dedryvere, M. Maccario, L. Croguennec, F. Le Cras, C. Delmas and D. Gonbeau, *Chemistry of Materials*, 2008, **20**, 7164-7170.
2. P. Voepel, C. Suchomski, A. Hofmann, S. Gross, P. Dolcet and B. Smarsly, *CrystEngComm*, 2016, **18**, 316-327.
3. N. Hatta, Y. Yoshida and H. Tomita, *Journal of The Electrochemical Society*, 2015, **162**, A1556-A1565.
